# Supplementary material for: Three genomes in the algal genus Volvox reveal the fate of a haploid sex-determining region after a transition to homothallism
Source: PubMed Central journal article supplement — Proc Natl Acad Sci U S A. 2021 May 19;118(21):e2100712118. doi: 10.1073/pnas.2100712118 (PMC8166075; doi:10.1073/pnas.2100712118), 2021-05-19
Supplement: pnas.2100712118.sapp.pdf [file pnas.2100712118.sapp.pdf]

**Supplementary Information for  
Three genomes in the algal genus *Volvox* reveal the fate of a  
haploid sex-determining region after a transition to  
homothallism**

Kayoko Yamamoto, Takashi Hamaji, Hiroko Kawai-Toyooka, Ryo Matsuzaki, Fumio Takahashi, Yoshiki Nishimura, Masanobu Kawachi, Hideki Noguchi, Yohei Minakuchi, James G. Umen, Atsushi Toyoda and Hisayoshi Nozaki

Hisayoshi Nozaki  
Email: [nozaki@bs.s.u-tokyo.ac.jp](mailto:nozaki@bs.s.u-tokyo.ac.jp)

**This PDF file includes:**

Supplementary text 1-5  
Figures S1 to S11  
Tables S1 to S7  
SI References 1-27

### Supplementary Information Text 1

#### **Bridging between Contig011 and Contig058 of *Volvox reticuliferus* female genotype.**

Genomic DNA of *V. reticuliferus* female culture strain NIES-3785 was prepared according to the method of Miller *et al.* (1). Specific primers (VrF\_058\_F1\_788.3k and VrF\_011\_R1\_2.7k; *SI Appendix*, Table S4) were designed for terminal regions of Contigs 011 and 058 to fill in a gap between the two contigs. PCR was performed using the total DNA and the two specific primers sets with KOD FX Neo (TOYOBO, Osaka, Japan) to amplify DNA fragments of ca 5 kbp long. PCR schedule was 2 min at 94°C, followed by 5 cycles of 10 s at 98°C and 60 s at 74°C, 5 cycles of 10 s at 98°C and 60 s at 72°C, 5 cycles of 10 s at 98°C and 60 s at 70°C, 40 cycles of 10 s at 98°C and 60 s at 68°C, 420 s at 68°C. For determining the nucleotide sequences, direct sequencing of the PCR-amplified fragments was carried out by cycle sequencing reactions with BigDye™ Terminator v3.1 Cycle Sequencing Kit (Applied Biosystems™, Thermo Fisher Scientific, Waltham, Massachusetts, USA) using specific primers (*SI Appendix*, Table S4). The determined sequence from all sets was 598 bp (Acc. No. LC582539) and demonstrated a bridging between Contig011 (368-1 positions) and Contig058 (790402-790173 positions) without gap between the contigs. Although the 598 bp sequence alternatively suggested another bridging between Contig011 (368-1 positions) and Contig013 (2289448-2289677 positions) without gap between the contigs, this bridging would result in discrepancy in one (*CGL55~TH/10*, Fig. 3A) of the two peripheral regions of *MT* which the large male Contig010 completely harbors. Thus, the bridging between Contig011 and Contig058 is more probable than that between Contig011 and Contig013.

### Supplementary Information Text 2

**Bridging between Contig018 and Contig132 of *Volvox africanus*.** Genomic DNA of *V. africanus* culture strain NIES-3780 was prepared according to the method of Miller *et al.* (1). Specific primers (VxAfr-SF1 and VxAfr-SR3; *SI Appendix*, Table S5) were designed for terminal regions of Contig018 and Contig132 to fill in a gap between the two contigs. PCR was performed using the total DNA and the two specific primers (VxAfr-SF1 and VxAfr-SR1/VxAfr-SR3) with Tks Gflex™ DNA Polymerase (Takara Bio., Osaka, Japan) to amplify DNA fragments of ca 5 kbp long. PCR schedule was 1 min at 94°C, followed by 40 cycles of 10 s at 98°C and 180 s at 68°C. For determining the nucleotide sequences, direct sequencing of the PCR amplified fragments was carried out by cycle sequencing reactions with BigDye™ Terminator v3.1 Cycle Sequencing Kit using internal primers (*SI Appendix*, Table S5). A sequence of 5148 bp (Acc. No. LC582540) was determined just internal to the primer pair (VxAfr-SF1 and VxAfr-SR3) to bridge Contig018 and Contig132. Based on the blastn search by GenomeMatcher 3.0 (2), 949-5148 positions of the 5148 sequence were best-fitted with the anterior 4198 bp (1-4198 positions) of Contig132 whereas the remaining 948 bp (1-948 positions) of the 5148 bp correspond to 1532837-1533784 positions of Contig018 (1534657 bp). Thus, the most posterior 873 bp (1533785-1534657 positions) of Contig018 were removed for bridging between Contig018 and Contig132.

### Supplementary Information Text 3

**Identification of *FUS1* sequence of *Volvox africanus*.** The polyadenylated mRNAs were directly isolated from *V. africanus* cells using Dynabeads Oligo(dT)<sub>25</sub> (Thermo Fisher Scientific), reverse transcribed with Superscript III reverse transcriptase (Thermo Fisher Scientific), and subjected to PCR (2 min at 94°C, followed by 30 cycles of 10 sec at 98°C, 30 sec at 65°C and 30 sec at 68°C) with two specific primers (FUS1\_E2\_F1: 5' -CCGTTTCGCATTTACAGTGCAGCTC-3' ; FUS1\_E4\_R1: 5' -GACAACCGACGCAGCTGGAGAAA-3' ) and KOD FX Neo (TOYOBO, Osaka, Japan). To extend the cDNA sequences, 5' RACE and 3' RACE were performed using the GeneRacer kit (Thermo Fisher Scientific) and three specific primers (FUS1\_E2\_R1: 5'-GCTGTATGGACGCCTCTGATTGGT-3'; FUS1\_E2\_R2: 5'-TGCGGAACCTGGCAAGAGTTTACA-3'; FUS1\_E4\_F1: 5'-TGCGTCGGTTGTCCACATGTTAAG-3'). The PCR products were directly sequenced, or first cloned into the pCR4Blunt-TOPO vector (Thermo Fisher Scientific). For determining the nucleotide sequences, direct sequencing of the PCR-amplified fragments was carried out by cycle sequencing reactions with BigDye™ Terminator v3.1 Cycle Sequencing Kit. Based on the cDNA sequence and genome sequence,

only sequence harboring exon2-exon4 of *FUS1* was recognized (*SI Appendix*, Fig. S4). No RNA-seq data were obtained regarding *V. africanus FUS1*.

#### Supplementary Information Text 4

**RNA-seq data mapping.** For RNA-seq data, total RNA was extracted from asexual and sexually induced culture for each culture strain (*SI Appendix*, Table S2) using RNeasy Plant Mini Kit (Qiagen, Hilden, Germany) according to the manufacturer's protocol. Contaminating DNA was removed using RNase-Free DNase I (Takara Bio Inc., Shiga, Japan). The RNA-seq libraries were constructed using a TruSeq Stranded mRNA Library Prep (Illumina) and were sequenced on the Illumina HiSeq 2500 instruments. The Illumina reads from each sample were mapped to the reference genome with HISAT v2-2.1.0 (3), setting the parameters of “-q --phred33 -p 16 --rna-strandness RF”. The mapped reads were then assembled into transcripts by StringTie v1.3.4d (3) with “--rf” option. Lastly, the candidate coding regions in transcript sequences were predicted by TransDecoder v5.2.0 (<https://github.com/TransDecoder/TransDecoder/wiki>).

#### Supplementary Information Text 5

**Molecular phylogenetic analyses.** Homologous protein sequences of fully sex-linked genes in *V. reticuliferus* and *V. africanus* (*SI Appendix*, Table S6) were retrieved from database of other volvocine algae by BLASTP (cutoff maximum E-value:  $5e-2$ ) on NCBI. *Chlamydomonas reinhardtii* protein sequences were treated as outgroups. When such an outgroup sequence was not retrieved, homologous sequences were extracted by BLASTP (cutoff maximum E-value:  $1e-1$ ) from *Chlamydomonas reinhardtii* v5.5 genome data in phytozome v12.1 (<https://phytozome.jgi.doe.gov/pz/portal.html#>). Phylogenetic analyses were performed using MUSCLE (4)-aligned full-length protein sequences of fully sex-linked genes (Fig. 3; *SI Appendix*, Figs. S6-S8). The maximum likelihood method was subjected to each alignment with complete deletion option and bootstrap analysis based on 1000 replications by MEGA X (5) using the best-fitted model selected by MEGA X (*SI Appendix*, Table S7). In addition, Bayesian inference for the respective alignments was carried out using MrBayes 3.2.7a (6) with the best-fitted model selected by ModelTest-NG 0.1.6 (7) (*SI Appendix*, Table S7), with 1000,000 generations of Markov chain Monte Carlo iterations (discarding the first 25% as burn-in). Convergence of the analysis was confirmed by the average standard deviation of split frequencies below 0.01.

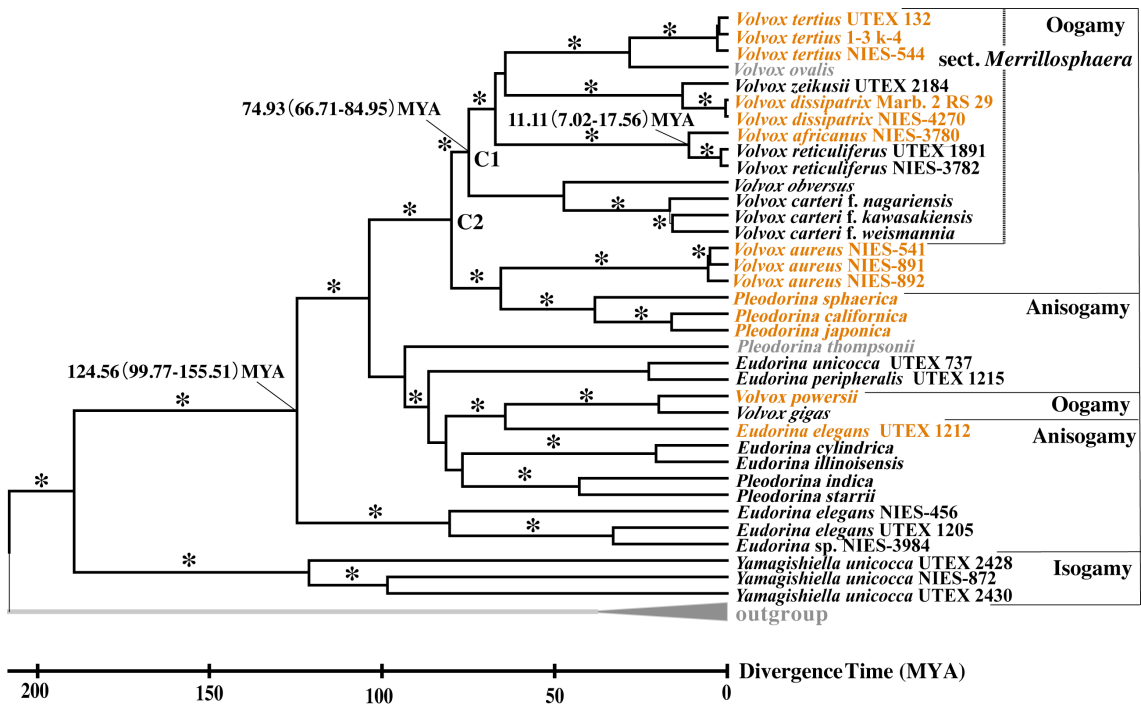

**Fig. S1.** Timetree analysis of advanced members of the colonial volvocine algae. Note that the divergence time between heterothallic *Volvox reticuliferus* and homothallic *V. africanus* is “11.11 (7.02-17.56) MYA”. Species names in orange or black indicate homothallic or heterothallic sexuality, respectively. Tree topology was inferred by maximum likelihood (ML) analyses of 6021 base pairs of five chloroplast genes (8) [TreeBase (9, 10) ID 26647 plus *Eudorina* sp. NIES-3984 (Acc. No. MH267732)] with a model selected by MEGA X (5). Asterisks on branches indicate 80% or more bootstrap values (based on 1000 replicates) by the ML analyses. A timetree was inferred by applying the RelTime method (11, 12) to the ML tree whose branch lengths were calculated using the ML method and the General Time Reversible substitution model (13). The timetree was computed using two calibration constraints (C1 (65-90 MYA) and C2 (50-90 MYA) based on TimeTree: the Time Scale of Life < <http://www.timetree.org/> (14, 15)). The Tao *et al.* (16) method was used to set minimum and maximum time boundaries on nodes for which calibration densities were provided. The estimated log likelihood value of the tree is -38392.49. A discrete Gamma distribution was used to model evolutionary rate differences among sites (5 categories (+G, parameter = 0.8168)). The rate variation model allowed for some sites to be evolutionarily invariable ([+I], 57.55% sites). This analysis involved 46 nucleotide sequences. Codon positions included were 1st+2nd+3rd. There were a total of 6021 positions in the final dataset. Evolutionary analyses were conducted in MEGA X.

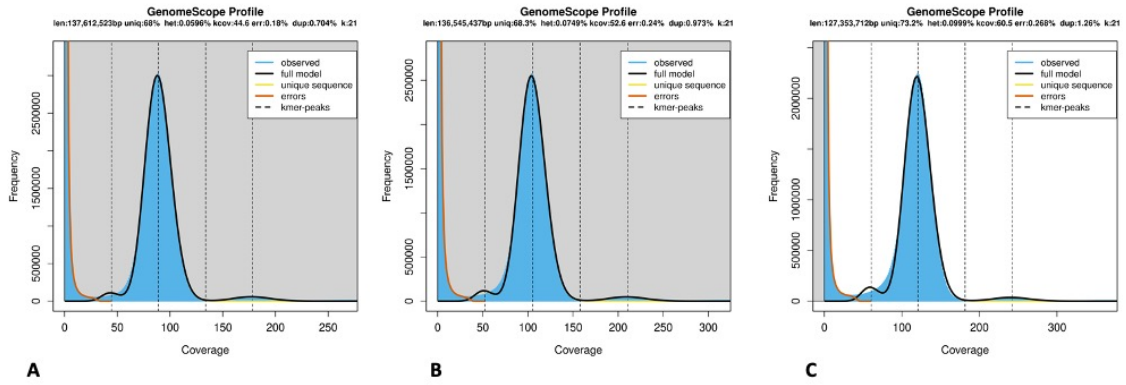

**Fig. S2.** GenomeScope profiles (17) showing  $k$ -mer frequencies in three genomes of *Volvox* (*S.I. Appendix, Table S2*). A. *V. reticuliferus* female. B. *V. reticuliferus* male. C. *V. africanus*.



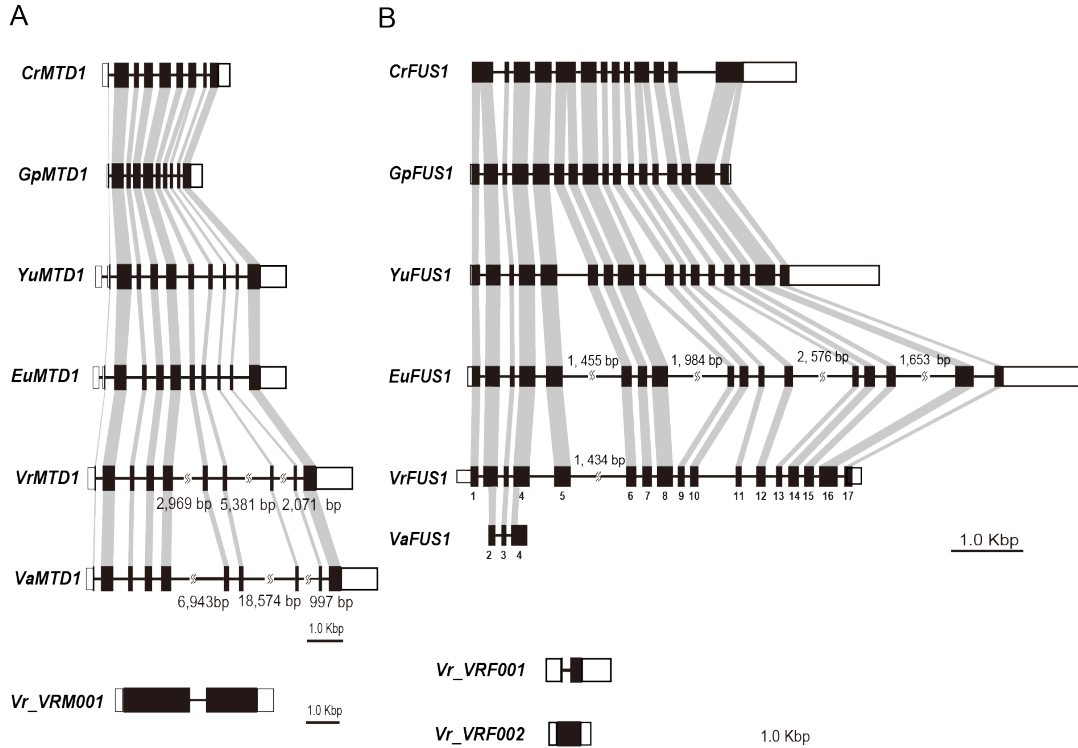

**Fig. S4.** The exon-intron structures of male- and female-specific genes of *Volvox reticuliferus* and their homologs in other volvocine species (Fig. 3). *Cr*, *Gp*, *Yu*, *Eu*, *Vr* and *Va* at the prefixes of gene names represent *Chlamydomonas reinhardtii*, *Gonium pectorale*, *Yamagishiella unicocca*, *Eudorina* sp., *V. reticuliferus* and *V. africanus*, respectively. Filled and open boxes represent coding and non-coding exon sequences, respectively. Lines between boxes represent introns. Gray boxes link homologous coding sequences. A. Two male-specific genes: *MTD1* and *VRM001*. For *MID* homologs, see Yamamoto *et al.* (18). B. Three female-specific genes: *FUS1*, *VRF001* and *VRF002*. Numbers below boxes for *VrFUS1* and *VaFUS1* indicate exon numbers.

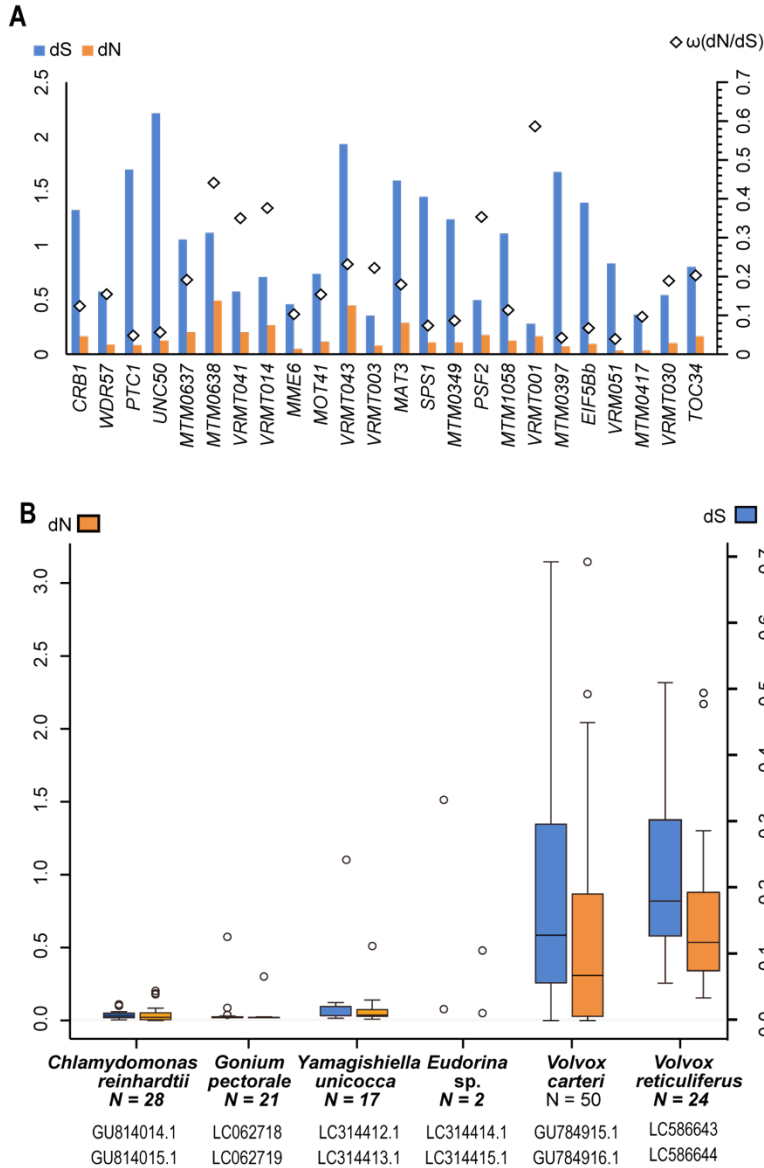

**Fig. S5.** Molecular evolutionary analyses of gametologs in *Volvox reticuliferus*. A. dN/dS ratios of gametologs in rearranged regions or sex-determining regions (SDRs) of *V. reticuliferus*. There are no prominently dimorphic gametologs under positive selection between sexes ( $dN/dS > 1$ ). B. Box-whisker plots comparing the distributions of synonymous (dS, blue/left) and non-synonymous (dN, orange/right) substitution values for gametolog pairs found in SDRs of volvocine algal haploid UV chromosomes. Open dots are outliers from interquartile ranges except for those of *Eudorina* sp. which indicate two gametologs.



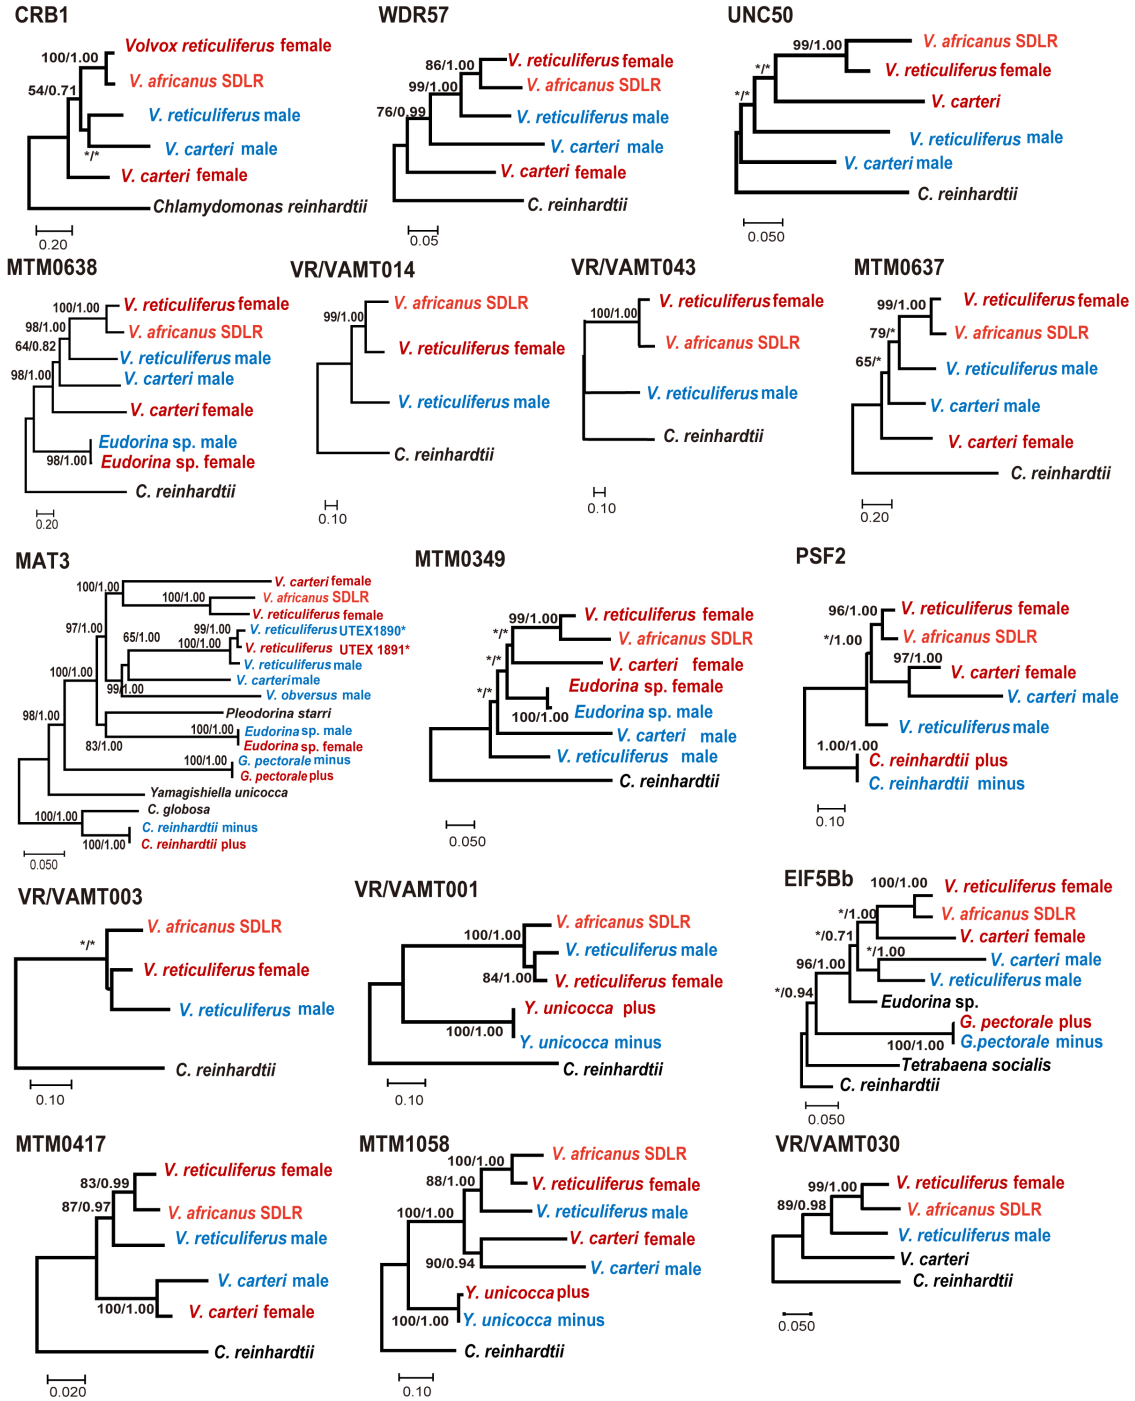

**Fig. S6.** Maximum likelihood (ML) phylogeny of 16 homologs of gametologs harboring in *Volvox africanus* SDR (Fig. 3). Red and blue represent homologs of gametologs from female SDR (SDLR) and male SDR, respectively. Note that 14 *V. africanus* homologs represent *V. reticuliferus* female SDR-related whereas male- or female-relation of the other two (*VAMT003* and *VAMT001*) are ambiguous. Numbers in left and right sides at branches indicate bootstrap values of ML analysis and posterior probabilities of Bayesian inference, respectively. For the other four gametolog homologs in *Volvox africanus* SDR, see Fig. 3 and Fig. S7 in *SI Appendix*.

MTM0397

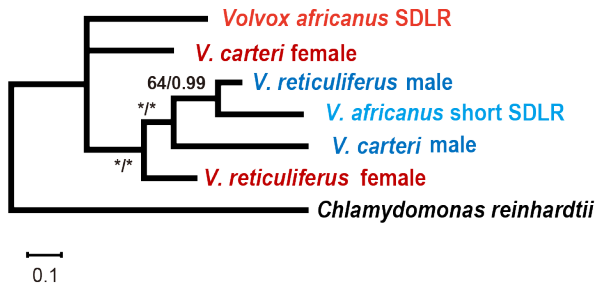

VR/VAMT051

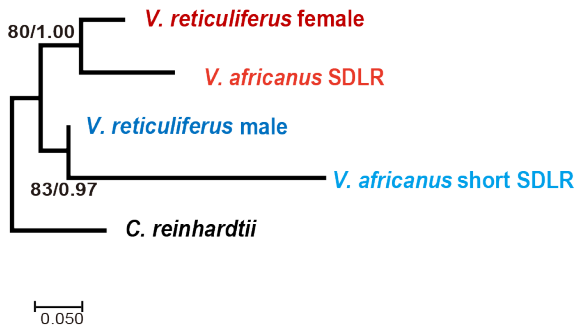

**Fig. S7.** Maximum likelihood (ML) phylogeny of two homologs of gametologs harboring in both SCLR and short SCLR of *Volvox africanus* (Fig. 3). Red and blue represent homologs of gametologs from female SCLR (SCLR) and male SCLR (short SCLR), respectively. Numbers in left and right sides at branches indicate bootstrap values of ML analysis and posterior probabilities of Bayesian inference, respectively. For the other gametolog homologs in *Volvox africanus* SCLR and short SCLR, see Fig. 3 and Fig. S6 in *SI Appendix*.

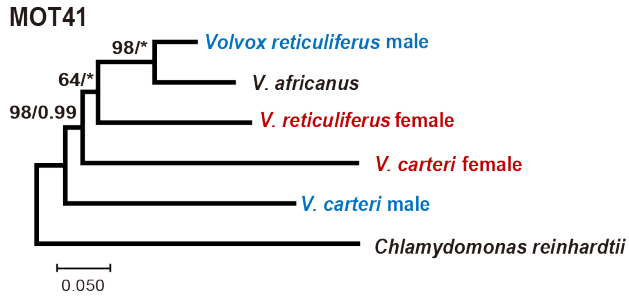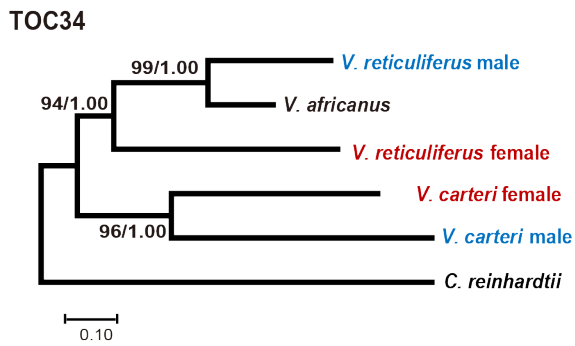

**Fig. S8.** Maximum likelihood (ML) phylogeny of and two gametologs of *Volvox reticuliferus*. Red and blue color in gene names represent gametologs from female and male SDR, respectively. Note that two *V. africanus* homologs are found within autosome-like regions (outside SDR and short SDR) (Fig. 4A). Numbers in left and right sides at branches indicate bootstrap values of ML analysis and posterior probabilities of Bayesian inference, respectively.



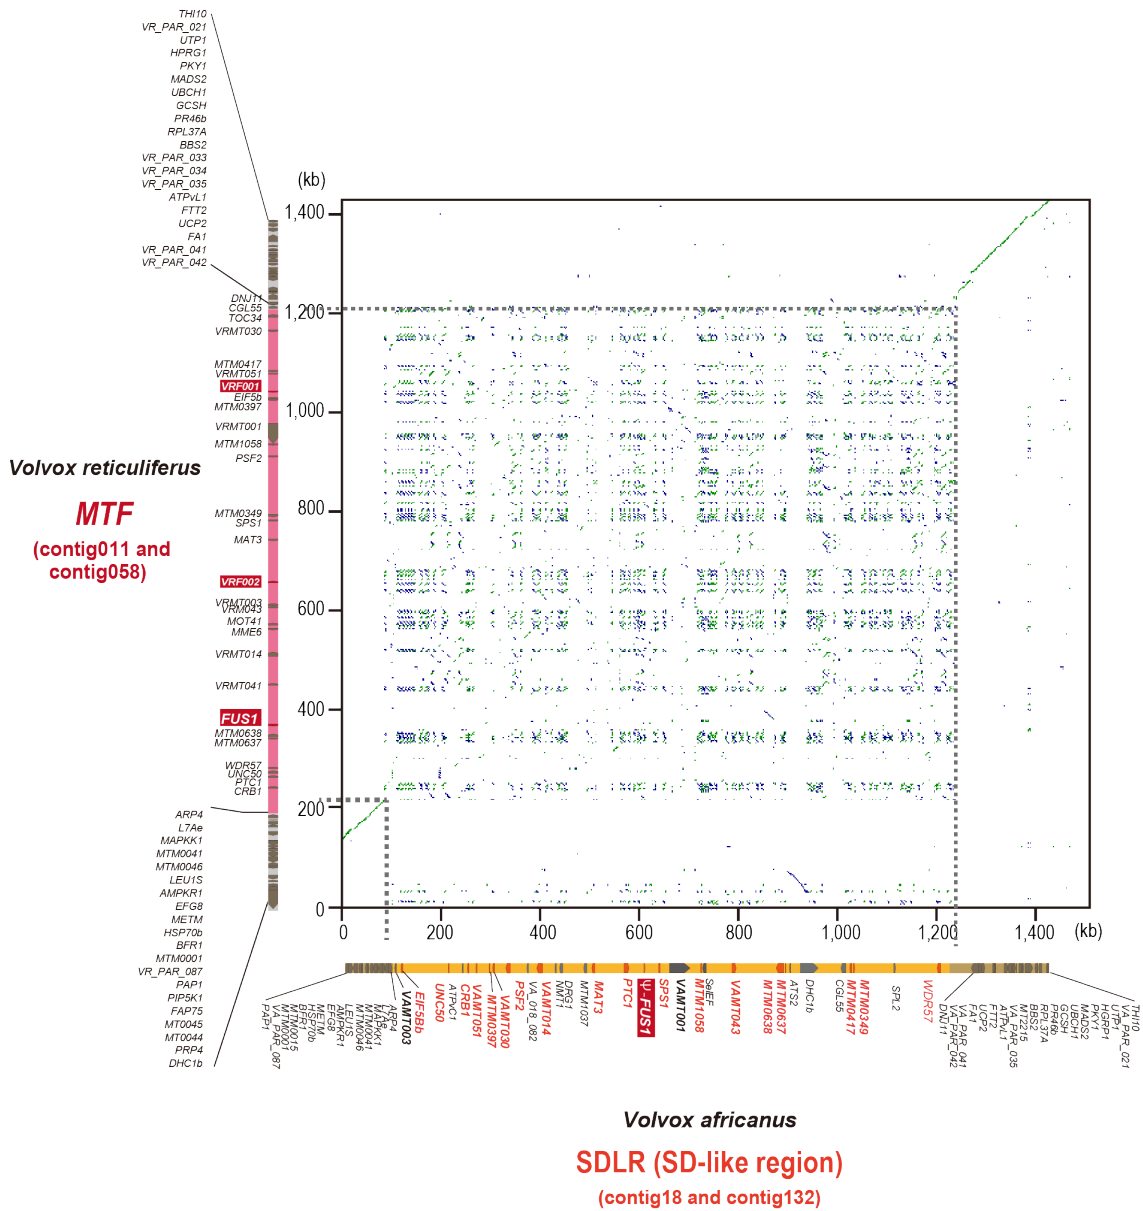

**Fig. S10.** Dotplot between *Volvox reticuliferus* fully sex-linked region (vertical, female SDR or MTF) and its homologous region of *Volvox africanus* (horizontal, SDLR) and parts of flanking or pseudo autosomal regions (gray). Green and blue dots indicate forward and reverse alignments, respectively. For details of MTF and SDLR, see Fig. 3.

*Volvox africanus*

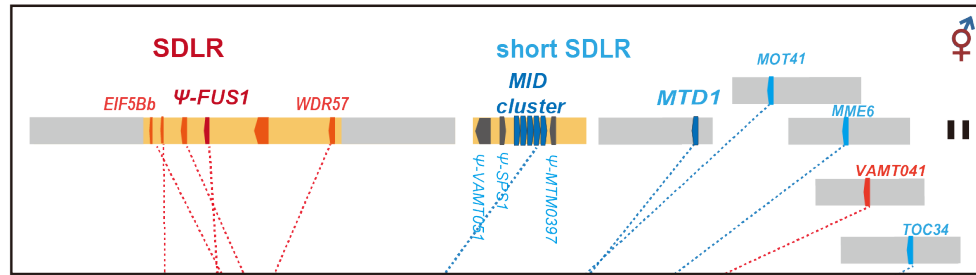

*Volvox reticuliferus*

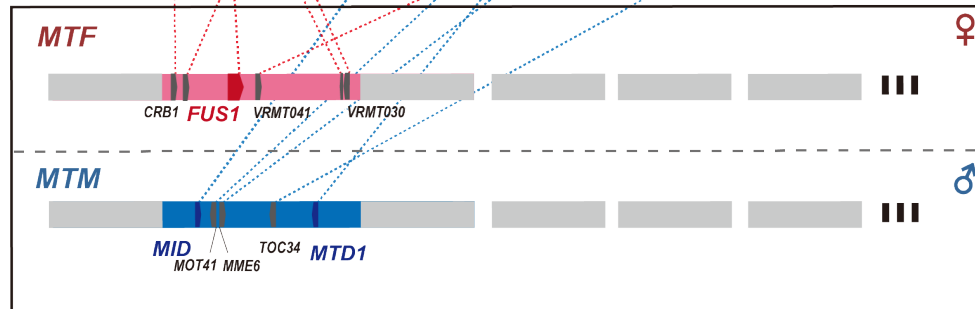

**Fig. S11.** Diagrammatic comparison between sex-determining region (SDR)-like sequences (SDLR and short SDLR) of homothallic *V. africanus* (upper panel) and female SDR (*MTF*) and male SDR (*MTM*) of heterothallic *Volvox reticuliferus* (lower panel). Only four homologs of female-related gametologs in SDLR are shown. Based on the present study.

**Table S1.** Four types of mating systems in the green algal genus *Volvox*\*.

| Basic system                  | heterothallic mating system**                    | homothallic mating system***                   |                                                  |                          |
|-------------------------------|--------------------------------------------------|------------------------------------------------|--------------------------------------------------|--------------------------|
|                               |                                                  | male and female spheroids by a single genotype | male and bisexual spheroids by a single genotype | bisexual spheroids       |
| Sexual spheroids produced**** | male and female spheroids by different genotypes | male and female spheroids by a single genotype | male and bisexual spheroids by a single genotype | bisexual spheroids       |
| <i>Volvox</i> species         | <i>V. carteri</i> , <i>V. reticuliferus</i>      | <i>V. aureus</i>                               | <i>V. africanus</i>                              | <i>V. ferrisii</i>       |
| References                    | Starr (20), Nozaki <i>et al.</i> (21)            | Darden (22)                                    | Nozaki <i>et al.</i> (21)                        | Isaka <i>et al.</i> (23) |

\*Based on Starr (24).

\*\*In the heterothallic (with distinct male and female genotypes, associated with a mating-type system that prevents fusion of gametes of the same sex) mating system, male or female is determined by the two complementary genotypes and a single clonal culture produces only one type of gametes, eggs in female spheroids or sperm in male spheroids. Thus, male or female is determined genetically in the heterothallic species or clonal culture strains. The heterothallic species perform only outcrossing.

\*\*\*In the homothallic (bisexual, with the ability to self-fertilize) mating system, gametes of both sexes (eggs and sperm) are produced within a single clonal culture (the same genotype). Thus, the homothallic species have possibility to form zygotes between gametes from identical genotype or a single clonal culture (selfing).

\*\*\*\**Volvox* sexual spheroids (individuals) may be “unisexual” (male or female) or “bisexual” (production of both sperm and eggs) depending upon a species or lineage. Thus, the homothallic *Volvox* mating system is further classified into three subtypes based on production of the types of sexual spheroids (24): production of both male and female sexual spheroids, production of both male and bisexual spheroids and production of only bisexual spheroids in a single clonal culture (genotype). Male, female and bisexual spheroids produce only male gametes (sperm), only female gametes (eggs) and both sperm and eggs, respectively.

**Table S2.** Comparison of details of whole nuclear genomes and SDR or SDLR/short SDLR of three *Volvox* culture strains.

|                         | Species                                                            | <i>V. reticuliferus</i>                  |                                          | <i>V. africanus</i>                       |
|-------------------------|--------------------------------------------------------------------|------------------------------------------|------------------------------------------|-------------------------------------------|
|                         | Mating type/ sex (culture strain)                                  | Female (NIES-3786)                       | Male (NIES-3785)                         | Homothallic (NIES-3780)                   |
| Whole genome            | Total length (bp) [Total number of gaps/non-ATGC nucleotides (bp)] | 133,065,142 [0/0]                        | 133,961,728 [0/0]                        | 129,328,469 [0/0]                         |
|                         | Number of contigs                                                  | 200                                      | 230                                      | 448                                       |
|                         | Min (bp)                                                           | 18,733                                   | 21,643                                   | 10,030                                    |
|                         | Max (bp)                                                           | 4,940,096                                | 5,524,336                                | 6,701,515                                 |
|                         | contig N50                                                         | 1,907,605                                | 1,866,906                                | 1,356,898                                 |
|                         | %GC                                                                | 54                                       | 54                                       | 53                                        |
|                         | Number of genes                                                    | 13,860                                   | 14,050                                   | 12,903                                    |
|                         | Gene density (genes/Mb)                                            | 104.2                                    | 104.9                                    | 99.7                                      |
|                         | Repeats (%)*                                                       | 26.82                                    | 26.82                                    | 25.85                                     |
|                         | BUSCO scores**                                                     | C: 97.7% S: 95.9% D: 1.8% F: 0.3% M:2.0% | C: 94.9% S: 93.0% D: 1.9% F: 0.4% M:4.7% | C: 98.1% S: 96.4% D: 1.6% F: 0.5% M: 1.4% |
|                         | Estimated genome size (Mbp)***                                     | 137.6                                    | 136.5                                    | 127.4                                     |
|                         | SDR or SDLR/ short SDLR                                            | Size (Mbp)                               | 1.01                                     | 0.98                                      |
| %GC                     |                                                                    | 51                                       | 51                                       | 51/50                                     |
| Number of genes         |                                                                    | 28                                       | 28                                       | 30/4                                      |
| Gene density (genes/Mb) |                                                                    | 27.64                                    | 28.82                                    | 29.44/20.00                               |
| Repeats (%)*            |                                                                    | 70.15                                    | 70.20                                    | 74.83/84.83                               |

\*Repetitive sequences identified using RepeatMasker-open-4-0-9 (<http://www.repeatmasker.org>) with Dfam3.0, generated libraries of repeats by RepeatScout (<http://bix.ucsd.edu/repeatscout/>).

\*\*BUSCO v4.0.4 (25) scores calculated based on chlorophyta\_odb10 (1,519 BUSCO). C: complete; S: complete and single-copy; D: complete and duplicated; F: fragmented; M: missing.

\*\*\*Based on *k-mer* profiles by GenomeScope (17).



**Table S3.** Comparison of whole genome and SDR or SDLR/short SDLR properties of the volvocine algae (Fig. 2)\*.

|                         |                 | Whole genome           |      |                 |                         |                                 |
|-------------------------|-----------------|------------------------|------|-----------------|-------------------------|---------------------------------|
| Species                 | Mating type/sex | Size/total length (Mb) | %GC  | Number of genes | Gene density (genes/Mb) | DDBJ/ENA/GenBank accessions no. |
| <i>V. reticuliferus</i> | Female          | 133                    | 54   | 13860           | 104.2                   | BNCP01000001-BNCP01000200       |
|                         | Male            | 134                    | 54   | 14050           | 104.8                   | BNCQ01000001-BNCQ01000230       |
| <i>V. africanus</i>     | Homothallic     | 127                    | 53   | 13716           | 108.1                   | BNCO01000001-BNCO01000448       |
| <i>V. carteri</i>       | Female          | 131.1                  | 56.1 | 14958           | 114                     | GCA_000143455.1                 |
|                         | Male            | N.d.                   | N.d. | N.d.**          | N.d.                    | N.d.                            |
| <i>Eudorina</i> sp.     | Female          | 184                    | 61   | N.d.            | N.d.                    | GCA_003117195.1                 |
|                         | Male            | 168.6                  | 61.3 | N.d.            | N.d.                    | GCA_003117095.1                 |
| <i>Y. unicocca</i>      | Plus            | 134.2                  | 61.1 | N.d.            | N.d.                    | GCA_003116995.1                 |
|                         | Minus           | 140.8                  | 60.8 | N.d.            | N.d.                    | GCA_003117035.1                 |
| <i>G. pectorale</i>     | Plus            | 149                    | 64.5 | 17990           | 121                     | GCA_001584585.1                 |
|                         | Minus           | N.d.                   | N.d. | N.d.            | N.d.                    | N.d.                            |
| <i>C. reinhardtii</i>   | Plus            | 111.1                  | 64.1 | 17732           | 159.6                   | GCA_000002595.2                 |
|                         | Minus           | N.d.                   | N.d. | N.d.            | N.d.                    | N.d.                            |

**Table S3.** Continued.

|                         |                 | SDR or SDLR/short SDLR |       |                        |                         |                                 |
|-------------------------|-----------------|------------------------|-------|------------------------|-------------------------|---------------------------------|
| Species                 | Mating type/sex | Size (Mb)              | %GC   | Number of genes        | Gene density (genes/Mb) | DDBJ/ENA/GenBank accessions no. |
| <i>V. reticuliferus</i> | Female          | 1.01                   | 51    | 28(25 <sup>***</sup> ) | 27.7                    | LC586643                        |
|                         | Male            | 0.98                   | 51    | 28(25)                 | 28.6                    | LC586644                        |
| <i>V. africanus</i>     | Homothallic     | 1.02                   | 51/50 | 30/4                   | 29.4/20                 | LC586641/<br>LC586642           |
| <i>V. carteri</i>       | Female          | 1.51                   | 52    | 55(50)                 | 39                      | GU784915.1                      |
|                         | Male            | 1.13                   | 53    | 60(50)                 | 54                      | GU784916.1                      |

|                       |        |       |      |        |      |            |
|-----------------------|--------|-------|------|--------|------|------------|
| <i>Eudorina</i> sp.   | Female | 0.09  | 53.9 | 3(2)   | 33.3 | LC314414.1 |
|                       | Male   | 0.007 | 51.4 | 3(2)   | 428  | LC314415.1 |
| <i>Y. unicocca</i>    | Plus   | 0.268 | 60.1 | 18(17) | 67.2 | LC314412.1 |
|                       | Minus  | 0.165 | 60.3 | 18(17) | 109  | LC314413.1 |
| <i>G. pectorale</i>   | Plus   | 0.366 | 59.7 | 24(21) | 58   | LC062718   |
|                       | Minus  | 0.499 | 61   | 24(21) | 46   | LC062719   |
| <i>C. reinhardtii</i> | Plus   | 0.31  | 60   | 35(22) | 109  | GU814014.1 |
|                       | Minus  | 0.204 | 61   | 25(22) | 118  | GU814015.1 |

\*References: *V. reticuliferus* and *V. africanus* (the present study); *C. reinhardtii* (19); *G. pectorale* (26); *Y. unicocca* and *Eudorina* sp. (27); *V. carteri* (19).

\*\*Not determined.

\*\*\*The number of gametologs in parentheses.

**Table S4.** Primers used for amplification and sequencing of the DNA fragments filling in a gap between Contigs 011 and 058 of *Volvox reticuliferus* female genotype.

| Primer name       | Sequence (5'-3')             | Nucleotide positions       |
|-------------------|------------------------------|----------------------------|
| VrF_058_F1_788.3k | ATCACGACGAAGGGTATCATCATTAGGC | 788289-788316 in Contig058 |
| VrF_058_F2_790.1k | TGCCTAGCTTTCTTTGCCGCAATAGAC  | 790135-790161 in Contig058 |
| VrF_011_R2_0.2k   | CATTAGGCTGCTTTAGTTCGCGTATGTG | 209-183 in Contig011       |
| VrF_011_R1_2.7k   | GGTTGCATGCACTCCCATTTCTTCAG   | 2751-2726 in Contig011     |

**Table S5.** Primers used for amplification and sequencing of the DNA fragments filling in a gap between Contigs 018 and 132 of *Volvox africanus*.

| Primer name | Sequence (5'-3')                 | Nucleotide positions         |
|-------------|----------------------------------|------------------------------|
| VxAfr-SF1   | GCCTGAGCTCGGTGATACTGACTTCGGGAG   | 1532807-1532836 in Contig018 |
| VxAfr-SR3   | AACGTGCTGGGGTGAATCATACCCTTGGCG   | 4228-4199 in Contig132       |
| VxAfr-In1   | TCGGAGGGACAGATGGTTTTGCTGAGCACT   | 1123-1152*                   |
| VxAfr-In2   | GGGATAACTCACAATATTCGACTCGCGTCG   | 1398-1427*                   |
| VxAfr-In3   | GGCCTTGATTGAGCAGACGAGGAGGCTGAG   | 2372-2401*                   |
| VxAfr-In4   | CGTGAACGGATACTTGCTGTATCTGACCGG   | 2408-2437*                   |
| VxAfr-In5   | GTGCGCAGCGTCGTAAGCCGGATCCTGTGC** | 3436-3407*                   |
| VxAfr-In6   | GGTGCACGACCGTTGTGCGCAGCGGTAGG    | 3493-3464*                   |
| VxAfr-In7   | GTCCGGATCCAGCAGTAAGGCCCACTTAGT   | 181-152*                     |
| VxAfr-In8   | GTTTAACGGTGTGGATGTAGCAGGCGTGCC   | 4222-4251*                   |
| VxAfr-In9   | TCTTCGCTTATGCAAGGGGACTCTGTTGGG   | 4714-4743*                   |
| VxAfr-In10  | GGTGGTTCAGGTCGACCTTGGTGGTTGTTT   | 4399-4428*                   |
| VxAfr-In11  | GGCGTGCCGGTTCGTTGACGGGGCCGGCA    | 4244-4273*                   |
| VxAfr-SF2   | ACTAAGTGGGCCTTACTGCTGGATCCGGAC   | 152-181*                     |
| VxAfr-SR1   | TGCCGGCCCCGTCAACGGAACCGGCACGCC   | 4273-4244*                   |
| VxAfr-SR2   | GCAAACGACACGAAGGGTACCTTGCCCAAC   | 4767-4738*                   |
| VxAfrR-3    | ATCTGGCGAACAACAGAAAGACTTAGC      | 1230-1204*                   |
| VxAfrR-4    | AAATTCGCTCGGACAGTATTCACAAAG**    | 1594-1568*                   |

\*Nucleotide positions in the bridging sequence (5148 bp: Acc. No. LC582540) between VxAF-SF1 (Contig018) and VxAF-SPR3 (Contig132).

\*\* Not completely identical to the bridging sequence.

**Table S6.** List of genes in SDR and pseudo autosomal regions of *Volvox reticuliferus* (Fig. 3) and their orthologs in *V. africanus* and *V. carteri*. Genes in SDR or R domain are shown in bold.

| <i>V. reticuliferus</i><br>gene | <i>V. africanus</i> ortholog |            | <i>V. carteri</i> ortholog |
|---------------------------------|------------------------------|------------|----------------------------|
|                                 | Location                     | Name       |                            |
| THI10                           | autosome-like                | THI10      | THI10                      |
| VR_PAR_021                      | autosome-like                | VA_PAR_021 | -                          |
| UTP1                            | autosome-like                | UTP1       | <b>UTP1</b>                |
| HGRP1                           | autosome-like                | HGRP1      | <b>HGRP1</b>               |
| PKY1                            | autosome-like                | PKY1       | PKY1                       |
| MADS2                           | autosome-like                | mads2      | MADS2                      |
| UBCH1                           | autosome-like                | UBCH1      | UBCH1                      |
| GCSH                            | autosome-like                | GCSH       | GCSH                       |
| PR46b                           | autosome-like                | PR46b      | PR46b                      |
| RPL37A                          | autosome-like                | RPL37A     | RPL37a                     |
| BBS2                            | autosome-like                | BBS2       | BBS2                       |
| VR_PAR_033                      | -                            | -          | VOLCADRAFT_99150           |
| VR_PAR_034                      | -                            | -          | VOLCADRAFT_99151           |
| VR_PAR_035                      | -                            | -          | -                          |
| ATPvL1                          | autosome-like                | ATPvL1     | <b>ATPvL1</b>              |
| FTT2                            | autosome-like                | FTT2       | <b>FTT2</b>                |
| UCP2                            | autosome-like                | UCP2       | <b>UCP2</b>                |
| FA1                             | autosome-like                | FA1        | <b>FA1</b>                 |
| VR_PAR_041                      | autosome-like                | VA_PAR_041 | -                          |
| VR_PAR_042                      | autosome-like                | VA_PAR_042 | VOLCADRAFT_88639           |
| DNJ11                           | autosome-like                | DNJ11      | dnj11                      |
| CGL55                           | SDLR                         | CGL55      | CGL55                      |
| <b>VRMT001</b>                  | SDLR                         | VAMT001    | -                          |
| <b>VRMT003</b>                  | SDLR                         | VAMT003    | -                          |
| <b>MTM1058</b>                  | SDLR                         | MTM1058    | <b>MTM1058</b>             |
| <b>MTM0349</b>                  | SDLR                         | MTM0349    | <b>MTM0349</b>             |
| <b>MTM0417</b>                  | SDLR                         | MTM0417    | <b>MTM0417</b>             |
| <b>MTD1*</b>                    | autosome-like                | MTD1       | <b>ψ-MTD1*</b>             |
| <b>VRM001*</b>                  | -                            | -          | -                          |
| <b>VRMT014</b>                  | SDLR                         | VAMT014    | -                          |

|                |                    |                    |                  |
|----------------|--------------------|--------------------|------------------|
| <b>WDR57</b>   | SDLR               | WDR57              | <b>WDR57</b>     |
| <b>VRMT030</b> | SDLR               | VAMT030            | VOLCADRAFT_89775 |
| <b>TOC34</b>   | autosome-like      | TOC34              | <b>TOC34</b>     |
| <b>SPS1</b>    | SDLR/short<br>SDLR | SPS1/ $\psi$ -SPS1 | <b>SPS1</b>      |
| <b>EIF5Bb</b>  | SDLR               | EIF5Bb             | <b>EIF5Bb</b>    |
| <b>MAT3</b>    | SDLR               | MAT3               | <b>MAT3</b>      |
| <b>CRB1</b>    | SDLR               | CRB1               | <b>CRB1</b>      |
| <b>VRMT041</b> | autosome-like      | VAMT041            | -                |
| <b>VRMT043</b> | SDLR               | VAMT043            | -                |
| <b>MTM0397</b> | SDLR/short<br>SDLR | MTM0397/           | <b>MTM0397</b>   |
|                |                    | $\psi$ -MTM0397    |                  |
| <b>MME6</b>    | autosome-like      | MME6               | <b>MME6</b>      |
| <b>MOT41</b>   | autosome-like      | MOT41              | <b>MOT41</b>     |
| <b>VRMT051</b> | SDLR/short<br>SDLR | VAMT051            | -                |
| <b>UNC50</b>   | SDLR               | UNC50              | <b>UNC50</b>     |
| <b>MID*</b>    | short SDLR         | MID                | <b>MID*</b>      |
| <b>MTM0637</b> | SDLR               | MTM0637            | <b>MTM0637</b>   |
| <b>MTM0638</b> | SDLR               | MTM0638            | <b>MTM0638</b>   |
| <b>PTC1</b>    | SDLR               | PTC1               | <b>PTC1</b>      |
| <b>PSF2</b>    | SDLR               | PSF2               | <b>PSF2</b>      |
| ARP4           | autosome-like      | ARP4               | <b>ARP4</b>      |
| L7Aef          | autosome-like      | L7Ae               | <b>L7Ae</b>      |
| MAPKK1         | autosome-like      | MAPKK1             | <b>MAPKK1</b>    |
| MTM0041        | autosome-like      | MTM0041            | <b>MTM0041</b>   |
| MTM0046        | autosome-like      | MTM0046            | <b>MTM0046</b>   |
| LEU1S          | autosome-like      | LEU1S              | <b>LEU1S</b>     |
| AMPKR1         | autosome-like      | AMPKR1             | <b>AMPKR1</b>    |
| EFG8           | autosome-like      | EFG8               | <b>EFG8</b>      |
| METM           | autosome-like      | METM               | <b>METM</b>      |
| HSP70b         | autosome-like      | HSP70b             | <b>HSP70</b>     |
| BFR1           | autosome-like      | BFR1               | <b>BFR1</b>      |
| MTM0001        | autosome-like      | MTM0001            | <b>MTM0001</b>   |
| VR_PAR_087     | autosome-like      | VA_PAR_087         | VPS53            |

|                 |               |            |              |
|-----------------|---------------|------------|--------------|
| PAP1            | autosome-like | PAP1       | PAP1         |
| PIP5K1          | -             | -          | PIP5K1       |
| FAP75           | -             | -          | FAP75        |
| MT0045          | autosome-like | Va.22190.1 | MT0045       |
| MT0044          | autosome-like | MT0044     | MT0044       |
| PRP4            | autosome-like | PRP4       | PRP4         |
| DHC1b           | SDLR          | DHC1b      | <b>DHC1b</b> |
| <b>VRF001**</b> | -             | -          | -            |
| <b>VRF002**</b> | -             | -          | -            |
| <b>FUS1**</b>   | SDLR          | ψ-FUS1     | -            |

\*Male-specific gene.

\*\*Female-specific gene.

**Table S7.** Models used for the maximum likelihood analyses (ML) and Bayesian inference (BI) in molecular phylogenetic analyses of homologs of fully sex-linked genes (male- and female-specific genes and gametologs) of *Volvox reticuliferus* and *V. africanus* (Figs. 3, 4; *SI Appendix*, Figs. S6-S8).

| Gene name         | ML_model*         | BI_model**   | Figure    |
|-------------------|-------------------|--------------|-----------|
| <i>CRB1</i>       | JTT +G            | Dayhoff +I+G | Figure S6 |
| <i>WDR57</i>      | JTT+G             | WAG+G        | Figure S6 |
| <i>PTC1</i>       | JTT+G             | WAG+G        | Figure 3B |
| <i>UNC50</i>      | JTT+G             | Cprev +G     | Figure S6 |
| <i>MTM0637</i>    | JTT+G+I           | Dayhoff+G    | Figure S6 |
| <i>MTM0638</i>    | JTT+G+I+F         | WAG+I+G      | Figure S6 |
| <i>VR/VAMT041</i> | JTT+G             | Dayhoff+G    | Figure 4B |
| <i>VR/VAMT014</i> | JTT+G             | Vt +G        | Figure S6 |
| <i>MME6</i>       | JTT+G             | WAG+I+G      | Figure 4B |
| <i>MOT41</i>      | JTT+G             | WAG+G        | Figure S8 |
| <i>VR/VAMT043</i> | JTT+G             | WAG+G        | Figure S6 |
| <i>VR/VAMT003</i> | LG+G <sup>f</sup> | Dayhoff+G    | Figure S6 |
| <i>MAT3</i>       | JTT+G             | Dayhoff+I+G  | Figure S6 |
| <i>SPS1</i>       | JTT+G             | Dayhoff+G    | Figure 3B |
| <i>MTM0349</i>    | JTT+G             | WAG+G        | Figure S6 |
| <i>PSF2</i>       | JTT+G             | Dayhoff+I+G  | Figure S6 |
| <i>MTM1058</i>    | JTT+G             | Dayhoff+G    | Figure S6 |
| <i>VR/VAMT001</i> | JTT+G+F           | WAG+G        | Figure S6 |
| <i>MTM0397</i>    | LG+G              | WAG+G        | Figure S7 |
| <i>eif5Bb</i>     | JTT+I             | Dayhoff+I    | Figure S6 |
| <i>VR/VAMT051</i> | JTT               | Vt           | Figure S7 |
| <i>MTM0417</i>    | JTT+G             | Dayhoff+G    | Figure S6 |
| <i>VR/VAMT030</i> | LG+G              | Vt+G         | Figure S6 |
| <i>TOC34</i>      | JTT+G             | WAG+G        | Figure S8 |
| <i>MID</i>        | JTT+G             | WAG+G        | Figure 3B |
| <i>MTD1</i>       | JTT+G             | WAG+G        | Figure 4B |
| <i>FUS1</i>       | JTT+G             | WAG+G        | Figure 3B |

\*The best-fitted model selected by MEGA X (5).

\*\*The best-fitted model was selected by Modeltest-NG 0.1.6 (7).



## SI References

1. S. M. Miller, R. Schmitt, D. L. Kirk, *Jordan*, an active *Volvox* transposable element similar to higher plant transposons. *Plant Cell* **5**, 1125–1138 (1993).
2. Y. Ohtsubo, W. Ikeda-Ohtsubo, Y. Nagata, M. Tsuda, GenomeMatcher: A graphical user interface for DNA sequence comparison. *BMC Bioinformatics* **9**, 376 (2008).
3. M. Pertea, D. Kim, G. M. Pertea, J. T. Leek, S. L. Salzberg, Transcript-level expression analysis of RNA-seq experiments with HISAT, StringTie and Ballgown. *Nature Protocols*. **11**, 1650–1667 (2016).
4. R. C. Edgar, MUSCLE: multiple sequence alignment with high accuracy and high throughput. *Nucleic Acids Res.* **32**, 1792–1797 (2004).
5. S. Kumar, G. Stecher, M. Li, C. Knyaz, K. Tamura, MEGA X: Molecular Evolutionary Genetics Analysis across computing platforms *Mol. Biol. Evol.* **35**, 1547–1549 (2018).
6. F. Ronquist *et al.*, MrBayes 3.2: Efficient Bayesian phylogenetic inference and model choice across a large model space. *Syst. Biol.* **61**, 539–542 (2012).
7. D. Darriba *et al.*, ModelTest-NG: a new and scalable tool for the selection of DNA and protein evolutionary models. *Mol. Biol. Evol.* **37**, 281–294 (2020).
8. H. Nozaki *et al.*, Morphology, reproduction and taxonomy of *Volvox dissipatrix* (Chlorophyceae) from Thailand, with a description of *Volvox zeikusii* sp. nov. *Phycologia* **58**, 192–199 (2019).
9. R. A. Vos, H. Lapp, W. H. Piel, V. Tannen, TreeBASE2: Rise of the machines. *Nat. Prec.* <https://doi.org/10.1038/npre.2010.4600.1>. Deposited 30 June 2010.
10. R. A. Vos *et al.*, NeXML: rich, extensible, and verifiable representation of comparative data and metadata. *Syst. Biol.* **61**, 675–689 (2012).
11. K. Tamura *et al.*, Estimating divergence times in large molecular phylogenies. *Proc. Natl. Acad. Sci. U.S.A.* **109**, 19333–19338 (2012).
12. K. Tamura, Q. Tao, S. Kumar, Theoretical foundation of the RelTime method for estimating divergence times from variable evolutionary rates. *Mol. Biol. Evol.* **35**, 1770–1782 (2018).
13. M. Nei, S. Kumar S, *Molecular Evolution and Phylogenetics* (Oxford University Press, 2000).
14. M. D. Herron, J. D. Hackett, F. O. Aylward, R. E. Michod, Triassic origin and early radiation of multicellular volvocine algae. *Proc. Natl. Acad. Sci. U.S.A.* **106**, 3254–3258 (2009).
15. M. Liss, D. L. Kirk, K. Beyser, S. Fabry, Intron sequences provide a tool for high-resolution phylogenetic analysis of volvocine algae. *Curr. Genet.* **31**, 214–227 (1997).
16. Q. Tao, K. Tamura, B. Mello, S. Kumar, Reliable confidence intervals for RelTime estimates of evolutionary divergence times. *Mol. Biol. Evol.* **37**, 280–290 (2020).
17. G. W. Vulture *et al.*, GenomeScope: fast reference-free genome profiling from short reads. *Bioinformatics* **33**, 2202–2204 (2017).
18. K. Yamamoto *et al.*, Molecular evolutionary analysis of a gender-limited MID ortholog from the homothallic species *Volvox africanus* with male and monoecious spheroids. *PLoS ONE* **12**, e0180313 (2017).
19. P. Ferris *et al.*, Evolution of an expanded sex-determining locus in *Volvox*. *Science* **328**, 351–354 (2010).
20. R. C. Starr, Structure, reproduction and differentiation in *Volvox carteri* f. *nagariensis* Iyengar, strains HK9 & 10. *Arch. Protistenkd.* **111**, 204–222 (1969).
21. H. Nozaki, R. Matsuzaki, K. Yamamoto, M. Kawachi, F. Takahashi, Delineating a new heterothallic species of *Volvox* (Volvocaceae, Chlorophyceae) using new strains of '*Volvox africanus*'. *PLoS ONE* **10**, e0142632 (2015).
22. W. H. Darden Jr., Sexual differentiation in *Volvox aureus*. *J Protozool.* **13**, 239–55 (1966).
23. N. Isaka, H. Kawai-Toyooka, R. Matsuzaki, T. Nakada, H. Nozaki, Description of two new monoecious species of *Volvox* sect. *Volvox* (Volvocaceae, Chlorophyceae), based on comparative morphology and molecular phylogeny of cultured material. *J Phycol.* **48**, 759–767 (2012).

24. R. C. Starr, "Sexual reproduction in *Volvox africanus*" in *Contribution in Phycology*, B. C. Parker, R. M. Brown Jr., Eds. (Allen Press, 1971), pp. 59–66.
25. F. A. Simão, R. M. Waterhouse, P. Ioannidis, E. V. Kriventseva, E. M. Zdobnov, BUSCO: assessing genome assembly and annotation completeness with single-copy orthologs. *Bioinformatics* **31**, 3210–3212 (2015).
26. T. Hamaji *et al.*, Sequence of the *Gonium pectorale* mating locus reveals a complex and dynamic history of changes in volvocine algal mating haplotypes. *G3 (Bethesda)* **6**, 1179–1189 (2016).
27. T. Hamaji *et al.*, Anisogamy evolved with a reduced sex-determining region in volvocine green algae. *Commun. Biol.* **1**, 17 (2018).
